# Supplementary material for: Applicability of Anti-Human Estrogen Receptor β Antibody PPZ0506 for the Immunodetection of Rodent Estrogen Receptor β Proteins
Source: PubMed Central journal article supplement (PMC6941125; doi:10.3390/ijms20246312), 2019-12-13
Supplement: ijms-20-06312-s001.pdf [file ijms-20-06312-s001.pdf]

# Supplementary Materials

## Materials and Methods

pcDNA3.1-mER $\alpha$ 66 and pcDNA3.1-rER $\alpha$ 66 vectors were constructed in our previous study [5]. Firefly luciferase reporter vectors (pERE-Luc and pControl-Luc) were purchased from Thermo Fisher Scientific. A *Renilla* luciferase vector (pRL-TK) was obtained from Promega.

## Dual luciferase reporter assay

HEK293 cells were seeded on 48-well culture plates (Techno Plastic Products). For assays to evaluate the transactivation abilities of respective constructs, cells were transfected with 125 ng/well reporter vectors (pERE-Luc or pControl-Luc), 100 ng/well respective constructs, and 12.5 ng/well pRL-TK vector. For competitive assays to evaluate the suppressive effects of ER $\beta$ <sub>ins</sub> variants, cells were transfected with 125 ng/well pERE-Luc vector, 25 ng/well ER $\alpha$ 66, ER $\beta$ 1, or corresponding empty constructs, 50 ng/well ER $\beta$ <sub>ins</sub> or pCMV-Tag 2B empty vectors, and 12.5 ng/well of pRL-TK vector. Twenty-four hours after transfection, the cells were treated with 10 nM E2 or 0.1% EtOH in DMEM with 2.5% charcoal-stripped FBS and 1% penicillin/streptomycin solution for 24 h. The cells were then washed with PBS and lysed in 80  $\mu$ L of 1  $\times$  Passive Lysis Buffer (Promega). Firefly and *Renilla* luciferase activities were measured using Dual Luciferase Reporter Systems (Promega) and a Lumat 9507 Luminometer (Berthold Technologies, Wildbad, Germany). Measurements were performed in duplicate. Relative luciferase activities were calculated as ratios of firefly/*Renilla* luciferase activities and normalized against respective mean values of empty vector-transfected and vehicle-treated samples.

## Statistical analysis

Data were expressed as the mean  $\pm$  SEM of six separate experiments. Statistical differences were evaluated by Student's *t*-test or two-way AOVA followed by Tukey's test and Student's *t*-test. *P*-values below 0.05 were regarded as statistically significant.

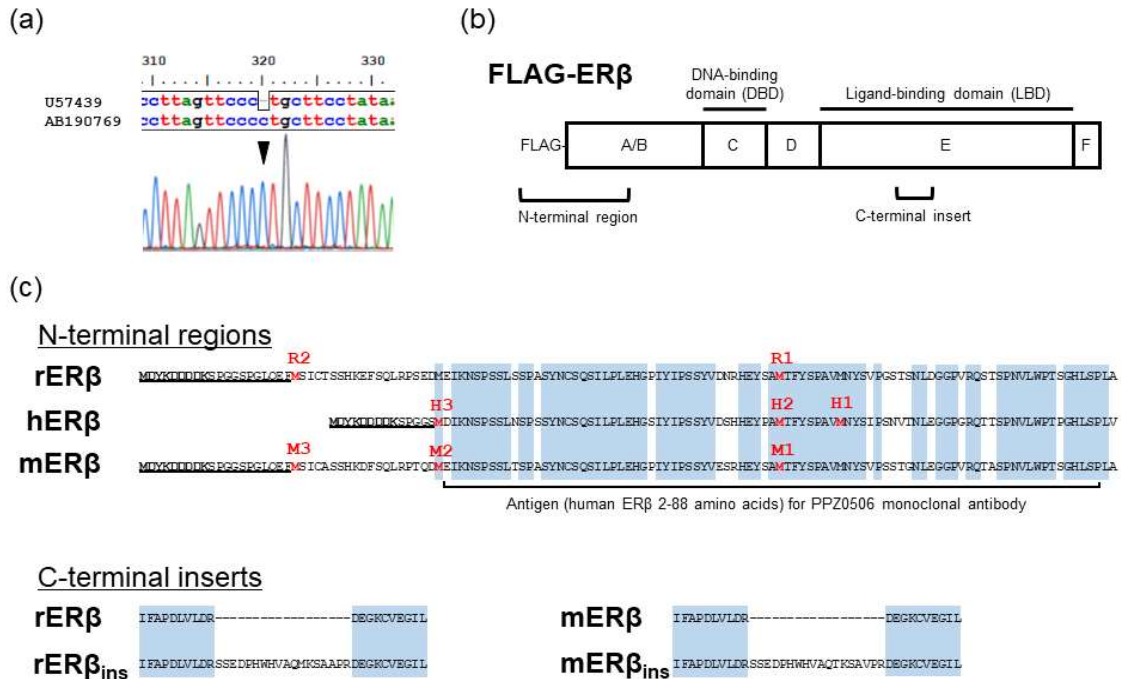

**Figure 1.** Sequences and structures of ER $\beta$  constructs. Nucleotide and amino acid sequences and schematic structures of ER $\beta$  constructs are shown. (a) An extra nucleotide insertion in the 5'-region of

the rat ER $\beta$  sequence. Pairwise alignment of U57439 and AB190769 sequences and the corresponding electropherogram of the cloned rat ER $\beta$  sequence are shown. (b) Schematic structure of FLAG-tagged ER $\beta$  proteins encoded in expression constructs. (c) Detailed amino acid sequences of the N-terminal regions of human, mouse, and rat ER $\beta$  proteins, and the inserted peptides of mouse and rat ER $\beta$ <sub>ins</sub> proteins. Panel c was constructed with reference to Leygue et al. [28].

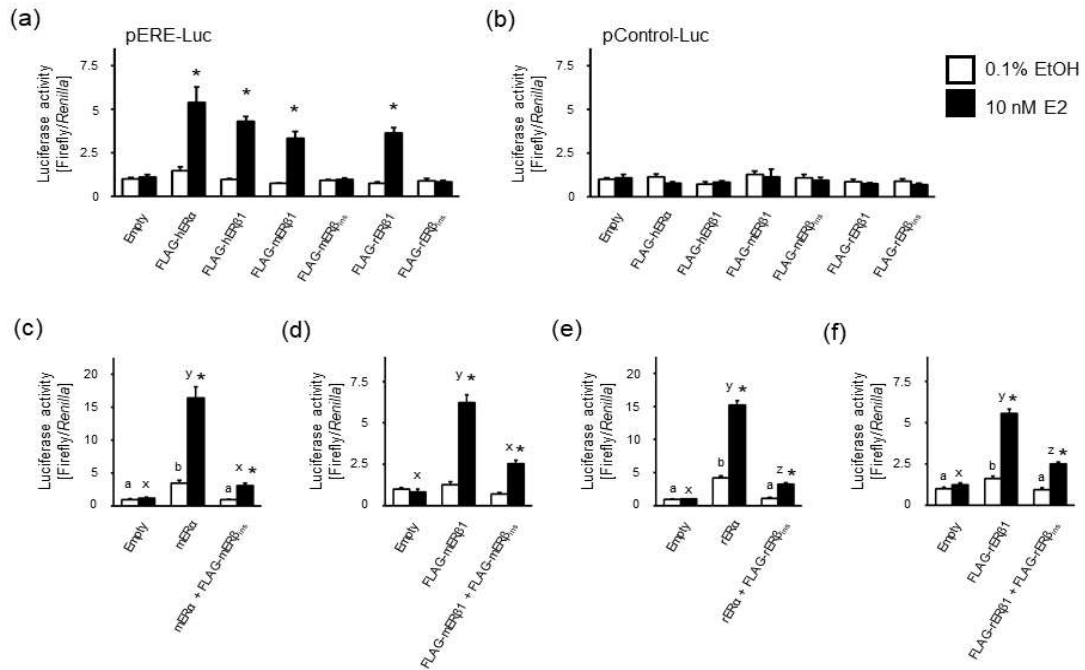

**Figure 2.** Transactivation activities of ER $\beta$  constructs. Functional expressions of human, mouse, and rat ER $\beta$  constructs in transfected cells were assessed by ERE luciferase reporter assays. (a) Transactivation of an ERE-driven promoter by human, mouse, and rat ER $\beta$  constructs. (b) Transactivation of an ERE-less minimum promoter by human, mouse, and rat ER $\beta$  constructs. (c-f) Repression of wild-type ER $\alpha$  (ER $\alpha$ 66; c and e)- and ER $\beta$  (ER $\beta$ 1; d and f)-mediated transactivation by mouse (c and d) and rat (e and f) ER $\beta$ <sub>ins</sub> constructs. Transfected cells were treated with 0.1% EtOH or 10 nM E2. Relative luciferase activities were calculated as ratios of firefly/*Renilla* luciferase activities and normalized against the respective mean values of the empty vector(s)-transfected and EtOH-treated samples. Six separate assays were performed (n = 6). Student's *t*-test: \*,  $P < 0.05$  between EtOH- and E2-treated groups; Tukey's test: different letter labeling (a-b and x-z),  $P < 0.05$  among EtOH- and E2-treated groups, respectively.

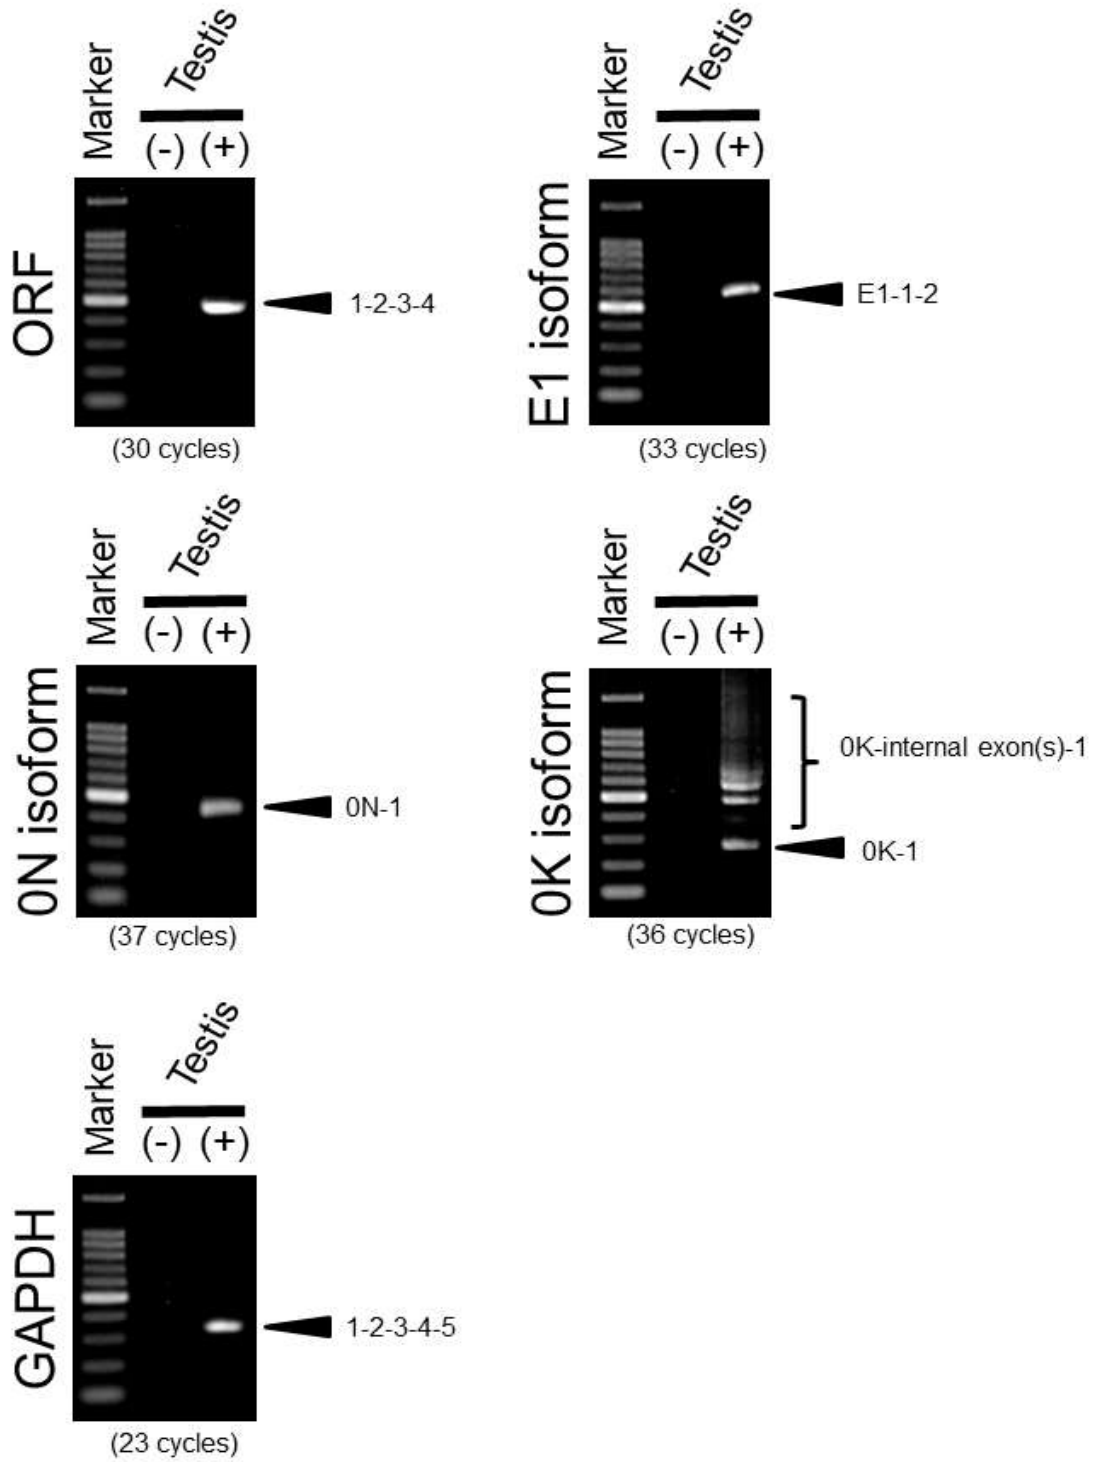

**Figure 3.** Alternative promoter usage and alternative splicing profiles of human ER $\beta$  gene in testis. The expression and splicing profiles of human ER $\beta$  isoforms in testis was investigated using RT-PCR. (-), Total RNA without reverse transcriptase; (+), reverse-transcribed cDNA.

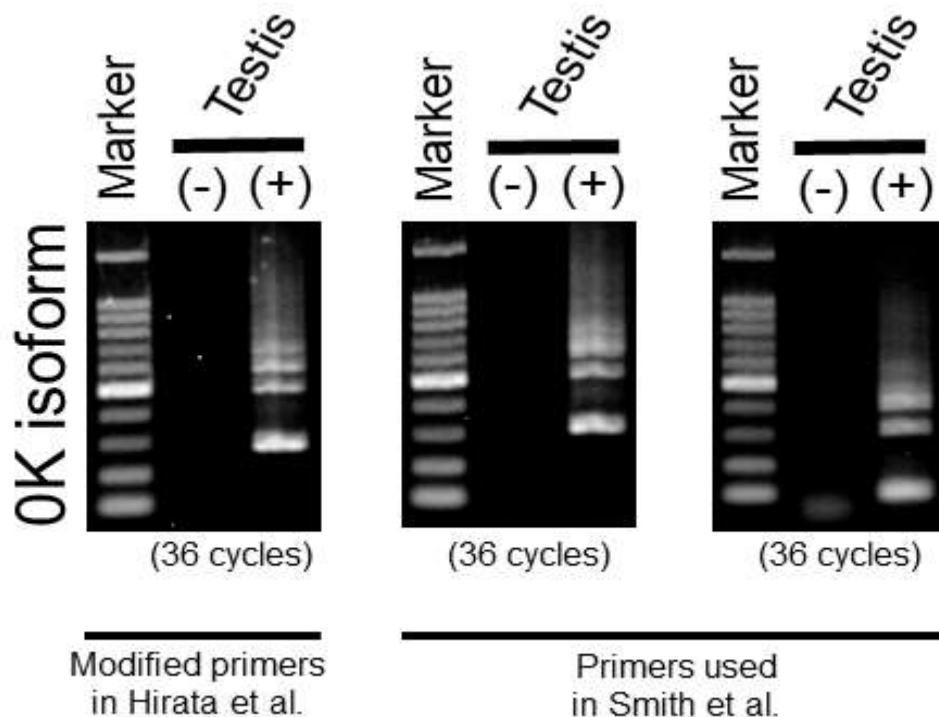

**Figure 4.** RT-PCR analysis of human ER $\beta$  0K isoforms using primer pairs reported in previous studies. The expression and splicing profiles of human ER $\beta$  0K isoforms in the testis was investigated using RT-PCR with primer pairs reported by Hirata et al. [14] and Smith et al. [11,12]. The band patterns observed using the primer pairs from previous studies are similar to those using our primer pairs (Suppl. Fig. 3). (-), Total RNA without reverse transcriptase; (+), reverse-transcribed cDNA.

(a) human exon 0K

```

GGCGGCGAGT CTCCCGGATG CTCCTCAGCT CTGGGGACGC GGTGCAGAAG
TGTGAGGGCG CCCGGCTTCC AGGCAGTAAT GGGCGGGTCC CTGCGCGGGA
GCGTGGCGGG CGCTGGACTC TACAGCAGAT GTGGAAGTGG AGAGCTTGGC
GCGCCTTCCG ACTTTGTCAC ACACCTGCGC CGCCAGACTG GGGTCGGGCC
CCTCCGCGTT CTGCTCTGGA GTGCCTGGGT CTGGGCCCAG CACCGCGCTT
TTAGAATCTC CTCAGCTGAA TCTGACGCTC AGCAGTGGGT GAAGCGCAGC
CCCCTGTTTC AGGCCCTGCC GAGCTGGAAG GAGTGTGAGA GCTGGAGCGC
GCGTGGCCCC CTCTGTGTTG GGGTCACCCC GGGGTTGCCA GGGCTCAGGG
AGGGTCGTAG TCTGGATTTT GTCACCCGCA CGTCCCCACC CCCCAGCAGG
TCTGGGGTTG GAGAATCCAC GCGGGCTTCA TAAGCTAGAT GCCAGTTAAC
TGTCGAGAGG GGACGCTCCC TCCTCGTAGG CGTCCACACT GGAGAAGGAA
TAAGATGGGC GATTGCCTGG GAAGCCTGAC AGGGCGGCGG CAGCTGGGAT
GCTGGAGAGG ACTGGCCCCT TGAGTTACTG AGTCCGATGA ATGTGCTTGC
TCTGCTGGAG GAACCGCGCT CAGGTTACAG TCATCCCAAT ATGGTTCTGA
AG

```

(b) human exon 0X1

```

TTCTCAAAGT TTGCACAAGC GGATATTTTA GAGGTACAGT GTAATATAAG
AGCTTCTGAA AATGTCCACT TAAGTTGTTT TATACCTGAG CAAGTGAAAT
TAAGAAGGGA ATTGAAGCAA ATATTCCTG

```

(c) human exon 0X2

ACATCCAAGT GGAGATATGG CATTTAAATT CATGAGATTG GATGAGATCC  
CACCAAAGGA ACAGGTTTAG GTGGAGACAA CCAAATACCG ATGCCTAGGA  
CACTGCAGTG TTTAGAATTC AAGGAGATGA GAAGGAAACA GGAGGGAAGA  
TTGAAAAGAA GAGTCCAGTG TGTATGAGG AAAACCCCAA GAGCATGCTG

CCTTACAAGA CAGGTGAAAA ATGTGTTCTG TGAAAGAAAG AGTAATTAAC  
TGTTAAATGT TACAGACTGA TCAAATAAAA TGAAGACTGA GAATGGCCTG  
TTTGTAAG

**(d) human exon 0X3**

ATCACTTTTA AAAGGAAAAC ATAGGAGCCT GAAACAGAAG TGGGAAACAA  
ATATTTACTC AAACTAAGAG ACTAAACTCA GTAGCCAGCA ACAAGAGATC  
AAG

**(e) human exon 0X4**

ATGGAGTCCT CCTCTGTCAC CCAGGCTGGA ACGCAGTGGT ATGATCTCGG  
CTAACTGCAA CCTCAGCCTG CCAGGTTCAA GCAATTCTTC TGCCCTCAGCC

TCCCGAGTAG CTGGGATTAC AGGTGCCTGC TGCCATGATG ATTAATTTTA  
TGTGTTAACT TAGCTGGGCT GTGTTGCCCA GATAGTTGGT TAAACATTAT  
TCTGGATGTT TCTGTGAAGA TGTFTTTGGA TGAGGTTAAC ATTTAGATCG  
GTGGACTTTG AGTAAAGCAG ATTACCTTTC ATAATTTGGG TGGGGCTCAT  
CCAATCAGTT GAACATCTGA AGAGACCAA AACTGACCT TCTGCAAGCA  
AAGAAAATT CTGCCAACAG ACAGCCATTG GACTTGAAC TCAACATTGA  
CTCTTCAGTC TATTGGCCA CCCTGCAAAT TTTGGACTTG CCA

**(f) human exon 0Y1**

GGACTCTAGA AATGCCAGAT AATCCACTT TTGTGGTGAC AGAAGAATCT  
GGCAATAATA GCTACCGTTT ACTGAACAAC AACTGCACAT TAAGCACTGT  
GTCATATGCT TTAG

**(g) human exon 0X5**

AGGGAGACAT CAACCTGTTG TGAAAAAGAA TGATCACTTA AAGTCTTTAG  
AAATTCTGAA CCAACTCTCT AGCAGGTGAT CCTTGTTAGA ATTTGAGCCC  
TTAACGCTAT CCAGGACTGG AGGTTGAAGG GACGATAGAG GGAGCAGGAG  
GAGAATGCAC ATGGATTAAG GAGCGAGAAC ACAG

**(h) human exon 0X6**

AAATCCTGGG CTCTCTTCTC CCAGCCACAA GGTTAGGTTG AAAAACAGAG  
CAGATGGAGG TAGTTTGTAG CCTACAGGTG CCCTGAATGA AGCTTCCACA  
GTGCTAAAGT GGAAGAACGA GGGACTCCAA GGAAGGATT CAAGGCTGGG  
CCCATGCACC TGTGTAATTC AGAAGAGACC CCAGAGGAGA TCAGCGCCCT  
CTAATTAGCC CTG

**(i) human exon 0X7**

TATCTGGGCT CTACAGGACA GACATGCCTC CATTTATGCA ACAAATAAGA  
ACAGCATCTC ATGACAGTGG AGAAAACATG GGATGTGCAG GTAG

**(j) human exon 0X8**

GGTTTTGTTT TGCCTCTTGG TAGTTTCTTT CCTACGGAAA ATTCTCCCTC  
TGATCTTTCC AAGTCAAAGG CTTACGAAA CATTTGTTGA ACGCGTGGAT  
TGTGCTAGGT GGGTGTATG GACCATGGAG AATGCTAGAG ATGTAAGACA

TGCGCTGTCC AATCGCAGCG CAGGTTGTGT TGACAG

**(k) human exons 0N and 0Y2**

GGCTCGGTCA CGTGGGCTCA GGCCTACTC CCCTCTACCC TCCTCTCGGT  
CTTTAAAAGG AAGAAGGGGC TTATCGTTAA GTCGCTTGTG ATCTTTTCAG  
TTTCTCCAGC TGCTGGCTTT TTGGACACCC ACTCCCCCGC CAGGAGGCAG  
TTGCAAGCGC GGAGGCTGCG AGAAATAACT GCCTCTTGAA ACTTGCAGGG  
CGAAGAGCAG GCGGCGAGCG CTGGGCCGGG GAGGGACCAC CCGAGCTGCG  
ACGGGCTCTG GGGCTGCGGG GCAGGGCTGG CGCCCGGAGC CTGAGCTGCA

GGAGGTGCGC TCGCTTTCCT CAACAGGTTGG CGGCGGGGCG CGCGCCGGGA  
GACCCCCCT AATGCGGGAA AAGCACGTGT CCGCATTTTA GAGAAGGCAA  
GGCCGGTGTG TTTATCTGCA AG

**(l) human exons E1 and 1**

ATTTTCATGT ATATTTTTC A GATGTATTT GTAATCTCAT ACAAACGTAT  
GTATTTTTTT AATGAAAATA TTTAAATTTT CATAGTTAAC AGCTGTAGCT

CTAACTTGGC AATATCTTCT GTGTTTCTTT ACAGCCATTA TACTTGCCCA  
CGAATCTTTG AGAACATTAT AATGACCTTT GTGCCTCTTC TTGCAAGGTG  
TTTTCTCAGC TGTTATCTCA AGACATGGAT ATAAAAAACT CACCATCTAG  
CCTTAATTCT CTTTCCCTCCT ACAACTGCAG TCAATCCATC TTACCCCTGG  
AGCACGGCTC CATATACATA CCTTCCCTCCT ATGTAGACAG CCACCATGAA  
TATCCAGCCA TGACATTCTA TAGCCCTGCT GTGATGAATT ACAGCATTCC  
CAGCAATGTC ACTAACTTGG AAGGTGGGCC TGGTCGGCAG ACCACAAGCC  
CAAATGTGTT GTGGCCAACA CCTGGGCACC TTTCTCCTTT AGTGGTCCAT  
CGCCAGTTAT CACATCTGTA TGCGGAACCT CAAAAGAGTC CCTGGTGTGA  
AGCAAGATCG CTAGAACACA CCTTACCTGT AAACAG

**(m) rat exon 0N/P1**

ACACTCTTTT CTAGGTCTTT AAAAGACGCA CTAACATCCG TTAGTCGTGG  
GTAATCTTTG CAGCTTCTCC AGCTGCTGGC CTTTTTGAAA CGCACTCTCA  
GGTCCCTGCC TTCAGCGAGG CTTCTAGAAT CAGCCACCTC TTGAAACTTC  
TTGGTGGGGA GCTGGCCCAG GGGGAGCGGC TGGTGTCTGCC ACTGGCATCC  
CTAGGCACCC AGGTCTGCAA TAAAGTCTGG CAGCCACTGC ATGGCTGAGC  
GACAACCAGT GGCTGGGAGT CCGGCTCTGT GGCTGAGGAA AGCACCTGTC  
TGCATTTAGA GAATGCAAAA TAGAGAATGT TTACCTGCCA G

**(n) rat exons E1/P2 and 1**

TGATTATATG GAAGCCCCAT TGCCCCTAGC TAAAATGAAT ATGTCTTAGT

CACTCTGGCA GCTTGAAC TA ACCAGACATC GTTTGCTTTC CTCTGCAGTC  
ATTACATCTG AGTCCCATGA GTCTCTGAGA ACATAATGTC CATCTGTACC  
TCTTCTCACA AGGAGTTTTC TCAGCTGCGA CCCTCTGAAG ACATGGAGAT  
CAAAAAC TCA CCGTCGAGCC TTAGTTCCCC TGCTTCCTAT AACTGTAGCC  
AGTCCATCCT ACCCCTGGAG CACGGCCCCA TCTACATCCC TTCCTCCTAC  
GTAGACAACC GCCATGAGTA TTCAGCTATG ACATTCTACA GTCCTGCTGT  
GATGAACTAC AGTGTTCCTG GCAGCACCAG TAACCTGGAC GGTGGGCCTG  
TCCGACAGAG CACAAGCCCA AATGTGCTAT GGCCAACTTC TGGGCACCTG  
TCTCCTTTAG CGACCCATTG CCAATCATCG CTCCTCTATG CAGAACCTCA  
AAAGAGTCCT TGGTGTGAAG CAAGATCACT AGAGCACACC TTACCTGTAA  
ACAG

**Figure 5.** Nucleotide sequences of 5'-UTR exons of human and rat ER $\beta$  genes. Nucleotide sequences of untranslated leader exons (0K, 0N, and E1) and internal exons (0X1-8 and 0Y1-2) in the 5'-regions of human and rat ER $\beta$  genes are shown. Alternative splicing donor and acceptor sites are indicated by open and closed arrowheads, respectively. The GT/AG boundaries of the alternative splice sites are underlined. The shaded region in human exon 0X7 refers to Moore et al. [19], Lee et al. [10], and sequences AB006589 and KC777387, and the shaded regions in rat exons 0N/P1 and E1/P2 refer to O'Brien et al. [15]. Of note, the human exon 0X5 sequence (KC777385) registered by Lee et al. [10] is in the antisense direction.

**Table 1.** Clones identified in 5'-RACE and RT-PCR experiments.

| Organ                                     | Experiments | Targets                                | Clones                                                                                                                                                                                                                                                                                                                                                                                                                                                                                                                                                                                                                      |
|-------------------------------------------|-------------|----------------------------------------|-----------------------------------------------------------------------------------------------------------------------------------------------------------------------------------------------------------------------------------------------------------------------------------------------------------------------------------------------------------------------------------------------------------------------------------------------------------------------------------------------------------------------------------------------------------------------------------------------------------------------------|
| Testis                                    | 5'-RACE     | 5'-UTR variants                        | 0K-1, 0K-0X1-1, 0K-0X2 <sub>L</sub> -1, 0K-0X2 <sub>S</sub> -1, 0K-0X1-0X2 <sub>L</sub> -1, 0K-0X1-0X2 <sub>S</sub> -1,<br>0K-0X2 <sub>S</sub> -0X4 <sub>L</sub> -1, 0K-0X6-0X7 <sub>S</sub> -1, 0K-0X2 <sub>S</sub> -0X4 <sub>S</sub> -0Y1-0X5-1,<br>0K-0X2 <sub>S</sub> -0Y1-0X5-0X6-0X7 <sub>S</sub> -0X8-1, 0N-1, E1-1                                                                                                                                                                                                                                                                                                  |
|                                           |             | ORF<br>0K isoforms                     | 1-2-3-4<br>0K-1, 0K-0X1-1, 0K-0X2 <sub>L</sub> -1, 0K-0X2 <sub>S</sub> -1, 0K-0X4 <sub>S</sub> -1, 0K-0Y2-1,<br>0K-0X1-0X2 <sub>L</sub> -1, 0K-0X1-0X2 <sub>S</sub> -1, 0K-0X2 <sub>L</sub> -0X4 <sub>L</sub> -1, 0K-0X2 <sub>S</sub> -0X4 <sub>L</sub> -1,<br>0K-0X2 <sub>S</sub> -0X5-1, 0K-0X2 <sub>S</sub> -0X6-1, 0K-0X2 <sub>S</sub> -0X7 <sub>S</sub> -1, 0K-0X6-0X7 <sub>S</sub> -1,<br>0K-0X2 <sub>L</sub> -0X3-0X4 <sub>S</sub> -1, 0K-0X2 <sub>S</sub> -0Y1-0X5-1, 0K-0X2 <sub>S</sub> -0X5-0X6-1,<br>0K-0X2 <sub>S</sub> -0X4 <sub>S</sub> -0Y1-0X5-1, 0K-0X2 <sub>S</sub> -0Y1-0X5-0X6-0X7 <sub>S</sub> -0X8-1 |
|                                           | 0N isoforms | 0N-1                                   |                                                                                                                                                                                                                                                                                                                                                                                                                                                                                                                                                                                                                             |
|                                           | E1 isoforms | E1-1-2                                 |                                                                                                                                                                                                                                                                                                                                                                                                                                                                                                                                                                                                                             |
| Ovary<br>Prostate                         | 5'-RACE     | 5'-UTR variants                        | 0N/P1-1, E1/P2-1<br>0N/P1-1                                                                                                                                                                                                                                                                                                                                                                                                                                                                                                                                                                                                 |
| Ovary/Prostate<br>Ovary/Prostate<br>Ovary | RT-PCR      | ORF<br>0N/P1 isoform<br>E1/P2 isoforms | 7-8<br>0N/P1-1<br>E1/P2-1-2                                                                                                                                                                                                                                                                                                                                                                                                                                                                                                                                                                                                 |

Table 2. Oligonucleotide primers used for 5'-RACE and RT-PCR.

| Purpose | Species   | Gene         | Exon        | Direction                  | Oligonucleotide sequence (5' to 3')                 | Comment/Reference                  |                                 |
|---------|-----------|--------------|-------------|----------------------------|-----------------------------------------------------|------------------------------------|---------------------------------|
| 5'-RACE | Universal |              |             | Forward                    | 5'-AAGCAGTGGTATCAACGCAGAGTACXXXX-3'                 | 5'-RACE adapter primer             |                                 |
|         |           |              |             | Forward                    | 5'-CTAATACGACTCACTATAGGGCAAGCAGTGGTATCAACGCAGAGT-3' | 5'-RACE universal primer mix       |                                 |
|         | Human     | <i>ESR2</i>  | 1           | Forward                    | 5'-CTAATACGACTCACTATAGGGC-3'                        | 5'-RACE universal primer mix       |                                 |
|         |           |              |             | Forward                    | 5'-AAGCAGTGGTATCAACGCAGAGT-3'                       | 5'-RACE nested universal primer    |                                 |
|         |           |              |             | Reverse                    | 5'-GTTTACAGGTAAGGT-3'                               | 5'-RACE gene-specific RT primer    |                                 |
|         |           |              |             | Reverse                    | 5'-AACACATTTGGGCTTGTGGT-3'                          | 5'-RACE gene-specific primer       |                                 |
|         |           | Rat          | <i>Esr2</i> | 2                          | Reverse                                             | 5'-TCCAGGGGTAAGATGGATTG-3'         | 5'-RACE gene-specific primer    |
|         |           |              |             |                            | Reverse                                             | 5'-TAATGATACCCAGAT-3'              | 5'-RACE gene-specific RT primer |
|         |           |              |             |                            | Reverse                                             | 5'-CAATGGGTCGCTAAAGGAGA-3'         | 5'-RACE gene-specific primer    |
|         |           |              |             |                            | Reverse                                             | 5'-TAAGGCTCGACGGTGAGTTT-3'         | 5'-RACE gene-specific primer    |
| RT-PCR  | Human     | <i>ESR2</i>  | 1           | Forward                    | 5'-CACCTGGGCACCTTTCTCCTTTAG-3'                      | NM_001437                          |                                 |
|         |           |              | 4           | Reverse                    | 5'-GCTCGTCGGCACTTCTCTGTCTC-3'                       | NM_001437                          |                                 |
|         |           |              | 0K          | Forward                    | 5'-TGGCCCCTTGAGTTACTGAG-3'                          | BX457807                           |                                 |
|         |           |              | 1           | Reverse                    | 5'-TCCAGGGGTAAGATGGATTG-3'                          | NM_001437                          |                                 |
|         |           |              | 0K          | Forward                    | 5'-CGATTGCCTGGGAAGCC-3'                             | Ref. [11]                          |                                 |
|         |           |              | 1           | Reverse                    | 5'-AGGAAGGTATGTATATGGAGCCG-3'                       | Ref. [11]                          |                                 |
|         |           |              | 0K          | Forward                    | 5'-AGTACTGAGTCCGATGAATGTGCTTG-3'                    | Ref. [12]                          |                                 |
|         |           |              | 1           | Reverse                    | 5'-CTCAAAGATTCGTGGGCAAGTATAATG-3'                   | Ref. [12]                          |                                 |
|         |           |              | 0K          | Forward                    | 5'-GGAGGAACCGCGCTCAGGTTA-3'                         | Ref. [14]                          |                                 |
|         |           |              | 1           | Reverse                    | 5'-GGCTATAGAATGTCATGGCTGG-3'                        | Ref. [14]                          |                                 |
|         |           |              | 0N          | Forward                    | 5'-AGGCTGCGAGAAATAACTGC-3'                          | NM_001437                          |                                 |
|         |           |              | 1           | Reverse                    | 5'-TCCAGGGGTAAGATGGATTG-3'                          | NM_001437                          |                                 |
|         |           |              | E1          | Forward                    | 5'-TAACAGCTGTAGCTCTAACTTG-3'                        | Ref. [12]                          |                                 |
|         |           |              | 2           | Reverse                    | 5'-CATCCCTCTTGAACCTGGA-3'                           | NM_001437                          |                                 |
|         |           | <i>ESR1</i>  | 2           | Forward                    | 5'-TCAGATAATCGACGCCAGGGTG-3'                        | NM_000125                          |                                 |
|         |           |              | 3           | Reverse                    | 5'-CACTTCGTAGCATTTGCGGAGCC-3'                       | NM_000125                          |                                 |
|         |           | <i>GAPDH</i> |             |                            | Forward                                             | 5'-TTCGACAGTCAGCCGCATCTTCTTTTG-3'  | NM_002046                       |
|         |           |              |             |                            | Reverse                                             | 5'-CGCCAGCATCGCCCCACTTG-3'         | NM_002046                       |
|         |           | Rat          | <i>Esr2</i> | 7                          | Forward                                             | 5'-GCAAACCAGGAGGCAGAAAGTAGC-3'     | AB190769                        |
|         |           |              |             |                            | Reverse                                             | 5'-AAGTGGGCAAGGAGACAGAAAGTAAGTA-3' | AB190769                        |
|         |           |              |             | 0H                         | Forward                                             | 5'-TTATCCTTCTGACGGACAG-3'          | Ref. [13]                       |
|         |           |              |             | 1                          | Reverse                                             | 5'-TAAGGCTCGACGGTGAGTTT-3'         | AB190769                        |
| 0N      | Forward   |              |             | 5'-AGGAAAGCACCTGTCTGCAT-3' | Ref. [15]                                           |                                    |                                 |
| 1       | Reverse   |              |             | 5'-CAATGGGTCGCTAAAGGAGA-3' | AB190769                                            |                                    |                                 |
| E1      | Forward   |              |             | 5'-TTATATGGAAGCCCCATTGC-3' | Ref. [15]                                           |                                    |                                 |
| 2       | Reverse   |              |             | 5'-CGCCGTAATGATACCCAGAT-3' | AB190769                                            |                                    |                                 |



|              |   |         |                                 |           |
|--------------|---|---------|---------------------------------|-----------|
| <i>Esr1</i>  | 6 | Forward | 5'-ACCTGCAGGGAGAAGAGTTTGTGT-3'  | AB477039  |
|              | 8 | Reverse | 5'-CTTGTGGGGAGCCTGGGAGTTC-3'    | AB477039  |
| <i>Gapdh</i> |   | Forward | 5'-TGTGCAGTGCCAGCCTCGTCTCATA-3' | NM_017008 |
|              |   | Reverse | 5'-ACCCTTTTGGCCCCACCCTTCAG-3'   | NM_017008 |

---
